# Supplementary material for: On the molecular mechanisms for the H2/CO2 separation performance of zeolite imidazolate framework two-layered membranes
Source: PubMed Central journal article supplement — Chem Sci. 2016 Aug 9;8(1):325–33. doi: 10.1039/c6sc02411d (PMC5365069; doi:10.1039/c6sc02411d), 2016-08-09
Supplement: SC-008-C6SC02411D-s001.pdf [file SC-008-C6SC02411D-s001.pdf]

# On the molecular mechanisms for the H<sub>2</sub>/CO<sub>2</sub> separation performance of zeolite imidazolate framework two-layered membranes

---

## Electronic Supporting Information

*Fernando Cacho-Bailo,<sup>a</sup> Ismael Matito-Martos,<sup>b</sup> Julio Perez-Carbajo,<sup>b</sup> Miren Etxeberría-Benavides,<sup>c</sup> Oğuz Karvan,<sup>c</sup> Víctor Sebastián,<sup>a,d</sup> Sofía Calero<sup>b,\*</sup> Carlos Téllez,<sup>a</sup> Joaquín Coronas,<sup>a,\*</sup>*

*<sup>a</sup> Chemical and Environmental Engineering Department and Instituto de Nanociencia de Aragón (INA), Universidad de Zaragoza, 50018 Zaragoza, Spain*

*<sup>b</sup> Faculty of Experimental Sciences, University Pablo de Olavide, 41013 Sevilla, Spain*

*<sup>c</sup> Tecnalia Research and Innovation, Energy and Environmental Division, 20009 Donostia-San Sebastian, Spain*

*<sup>d</sup> CIBER de Bioingeniería, Biomateriales y Nanomedicina, CIBER-BBN, 50018 Zaragoza, Spain*

*\*J. Coronas, e-mail: coronas@unizar.es, Tel: (+34) 976762471; S. Calero, e-mail: scalero@upo.es, Tel: (+34) 954978312.*

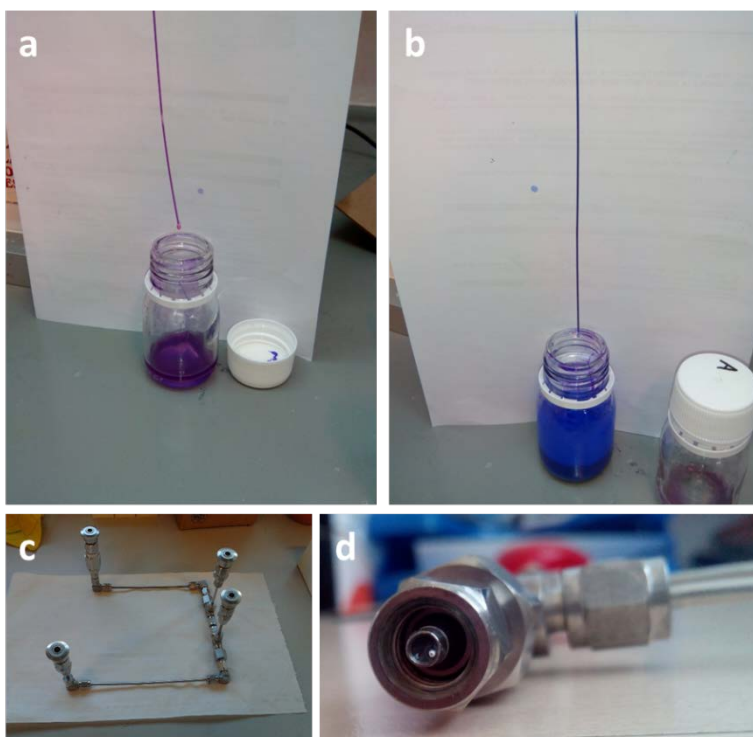

Figure S1. Images of the microfluidic ZIF@P84 HF membrane synthesis, showing ZIF-9 liquid phase epitaxy (LPE) steps: support wetting with the cobalt salt purple solution (a) and pumping of deprotonated ligand giving rise to crystalline blue ZIF-9 (b). HF gas permeation module for HF membrane testing (c) and higher magnification showing the epoxy resin sealing (d).

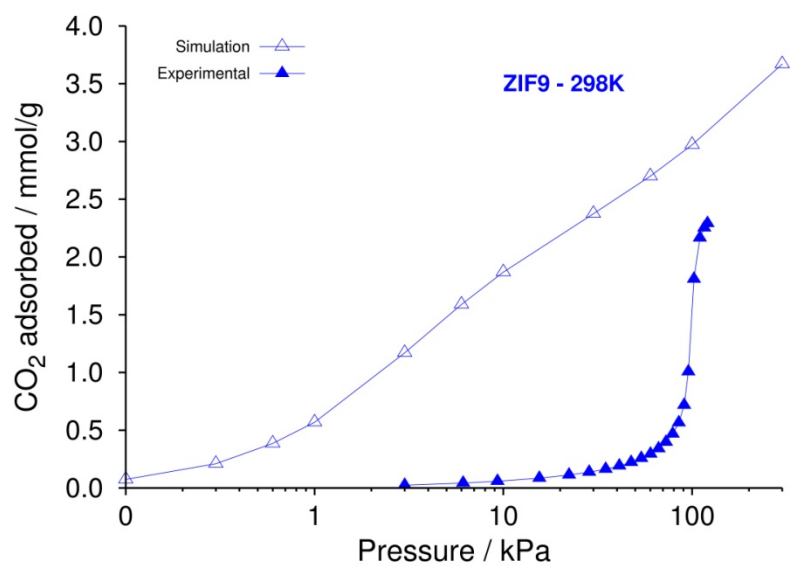

Figure S2. Simulated (empty) and experimental (filled symbols) ZIF-9 CO<sub>2</sub> adsorption isotherm at 25 °C. Phase transitions upon loading that cannot yet be reproduced by molecular simulation are clearly shown in the experimental curve.

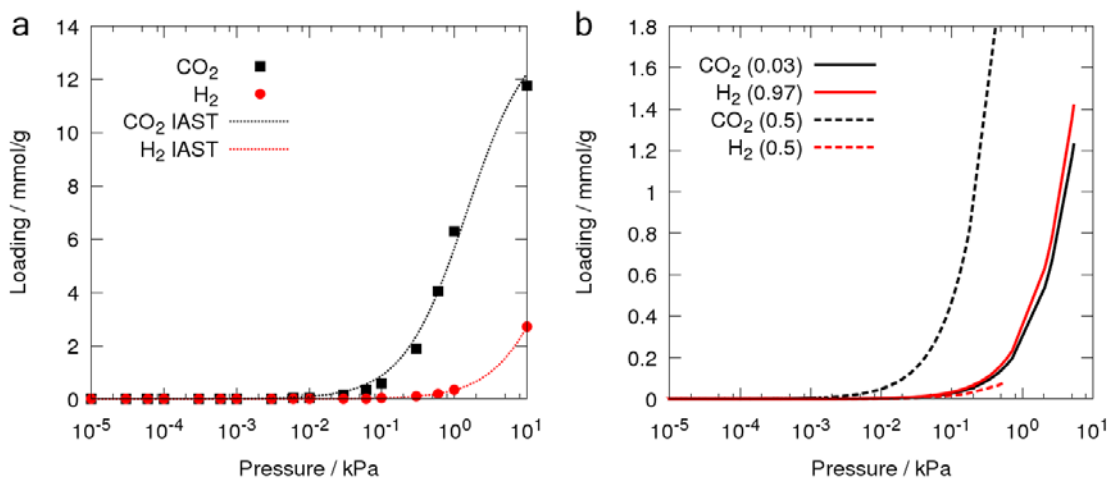

Figure S3. (a) Pure CO<sub>2</sub> and H<sub>2</sub> simulated adsorption isotherms in ZIF-8 at 35 °C (symbols) and their respective IAST adjustments (dotted lines). (b) 97% H<sub>2</sub> / 3% CO<sub>2</sub> mixture (continuous lines) and equimolar H<sub>2</sub>/CO<sub>2</sub> mixture (dashed lines) predicted adsorption isotherms by IAST in ZIF-8 at 35 °C (see further information on IAST below).

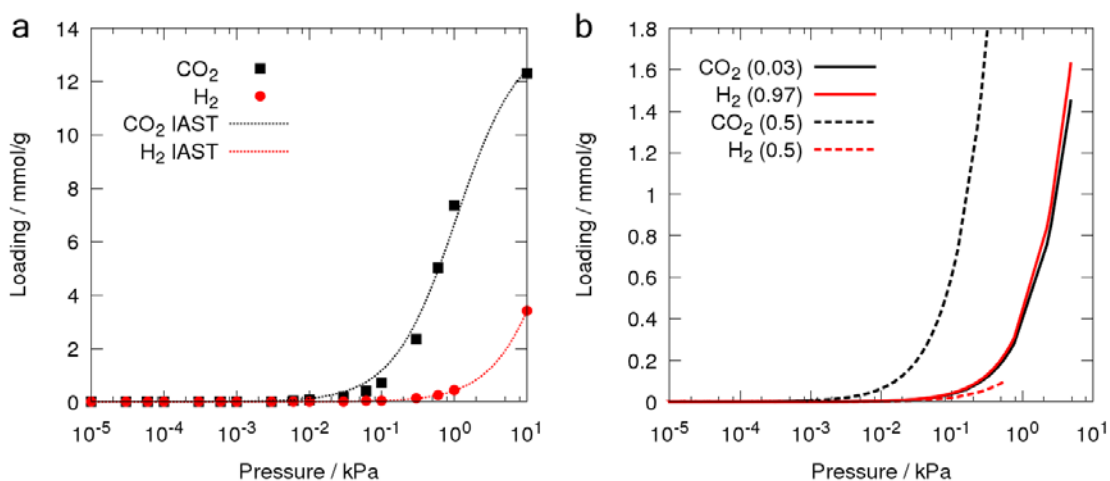

Figure S4. (a) Pure CO<sub>2</sub> and H<sub>2</sub> simulated adsorption isotherms in ZIF-67 at 35 °C (symbols) and their respective IAST adjustments (dotted lines). (b) 97% H<sub>2</sub> / 3% CO<sub>2</sub> mixture (continuous lines) and equimolar H<sub>2</sub>/CO<sub>2</sub> mixture (dashed lines) predicted adsorption isotherms by IAST in ZIF-67 at 35 °C (see further information on IAST below).

The Ideal Adsorption Solution Theory (IAST)<sup>S1</sup> is an approach to make predictions of adsorption isotherms for fluid mixtures from the pure-component data, which are easier to obtain both in experimental and computational ways. The approach has been widely used to accurately describe light gas mixture adsorption isotherms, e.g. CO<sub>2</sub> and H<sub>2</sub>, in several porous materials, including ZIFs. Prior to making the mixture prediction, it is necessary to fit the model used to describe the behaviour of the pure compounds in the adsorbents (left plots in Figures S3 and S4), and then, using the same model, to carry out the mixture calculations (right plots in Figures S3 and S4). For our systems, Langmuir model<sup>S2</sup> was used.

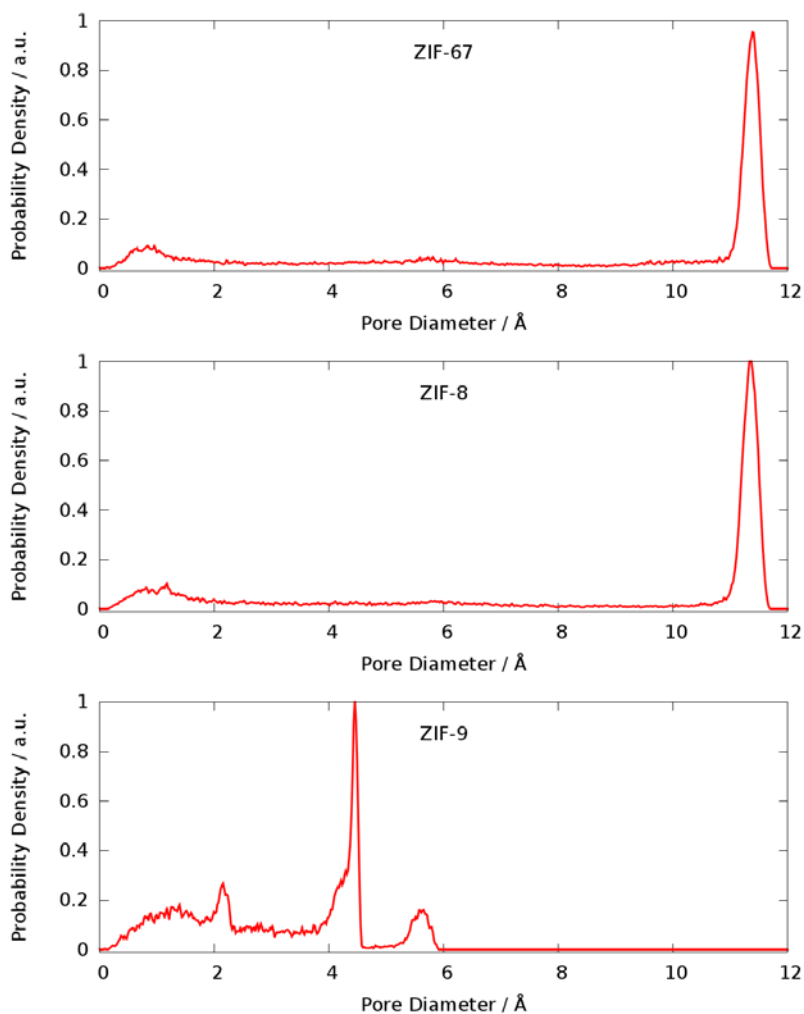

Figure S5. Pore size distribution (PSD) of ZIF-67, ZIF-8 and ZIF-9 materials obtained by molecular simulation using the method reported by Gelb and Gubbins.<sup>S3</sup>

Table S1. Large Cavity Diameter (LCD) and Pore Limiting Diameter (PLD) of ZIF-67, ZIF-8 and ZIF-9 materials obtained by using Zeo++ program.<sup>S4-S5</sup>

| Material | LCD / Å | PLD / Å |
|----------|---------|---------|
| ZIF-67   | 11.84   | 3.43    |
| ZIF-8    | 11.81   | 3.46    |
| ZIF-9    | 5.62    | 2.44    |

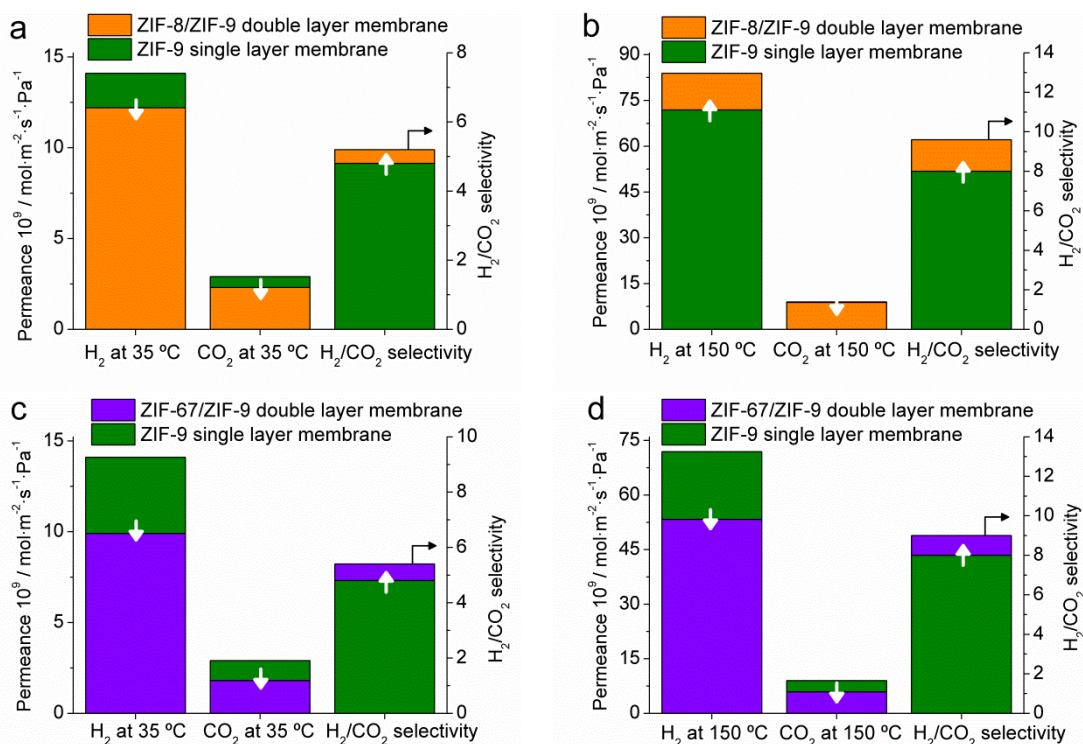

Figure S6.  $\text{H}_2$  and  $\text{CO}_2$  permeances and  $\text{H}_2/\text{CO}_2$  selectivity comparison between single ZIF-9 and double-layered ZIF-8/ZIF-9 (a,b) and ZIF-67/ZIF-9@P84 (c,d) membranes at two different temperatures (35 and 150 °C). White arrows indicate the variations after the mIm-based ZIF (ZIF-8 or ZIF-67) layer growth on ZIF-9.

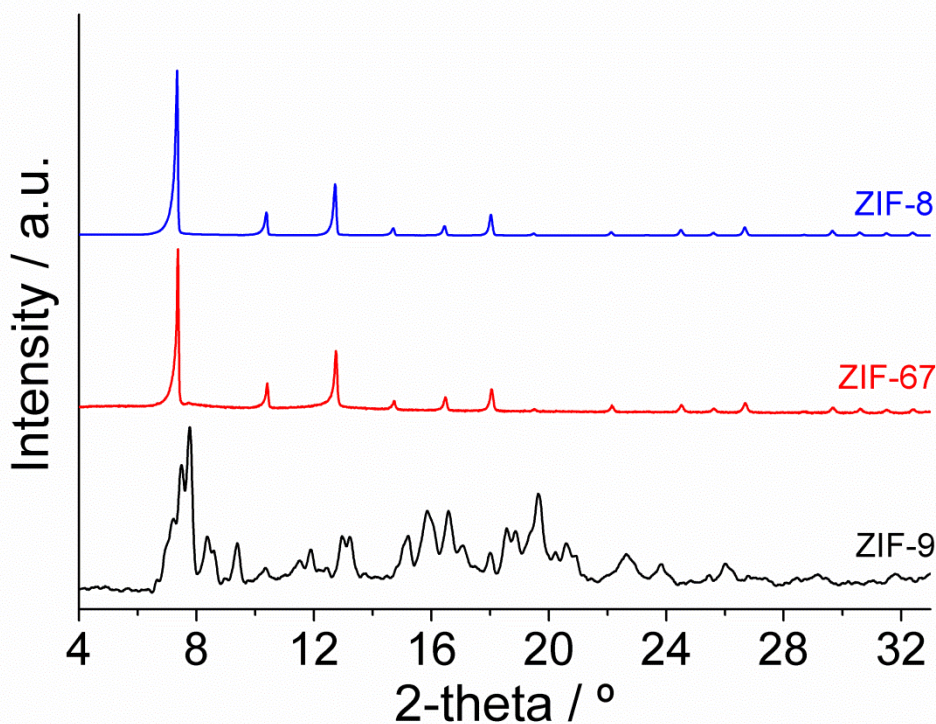

Figure S7. XRD spectra of the powdered ZIF materials after a 24 h-treatment at 175 °C, similar to the conditions of the gas separation tests carried out. As observed when compared with Figure 4, the materials retain their crystalline structures.



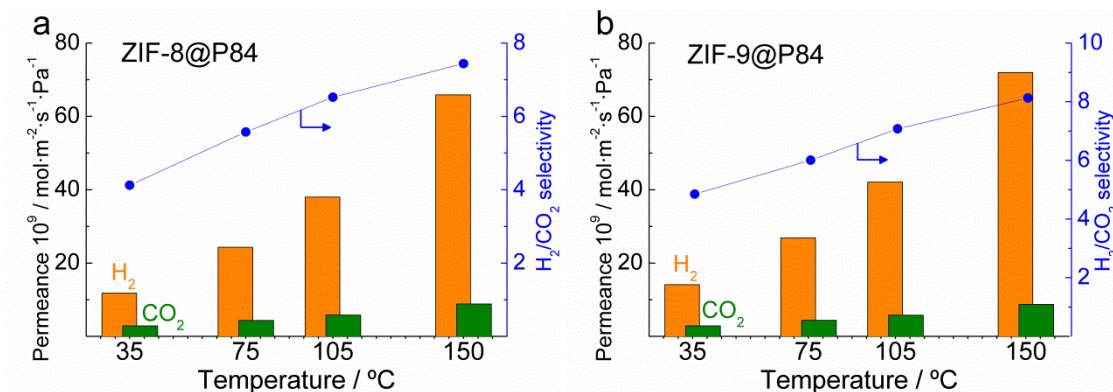

Figure S8. Single-layered ZIF-8 (a) and ZIF-9 (b) membrane permeation properties in the  $H_2/CO_2$  mixture separation depending on the temperature in the 35-150 °C range. Apparent activation energies were calculated and shown in Table 2.

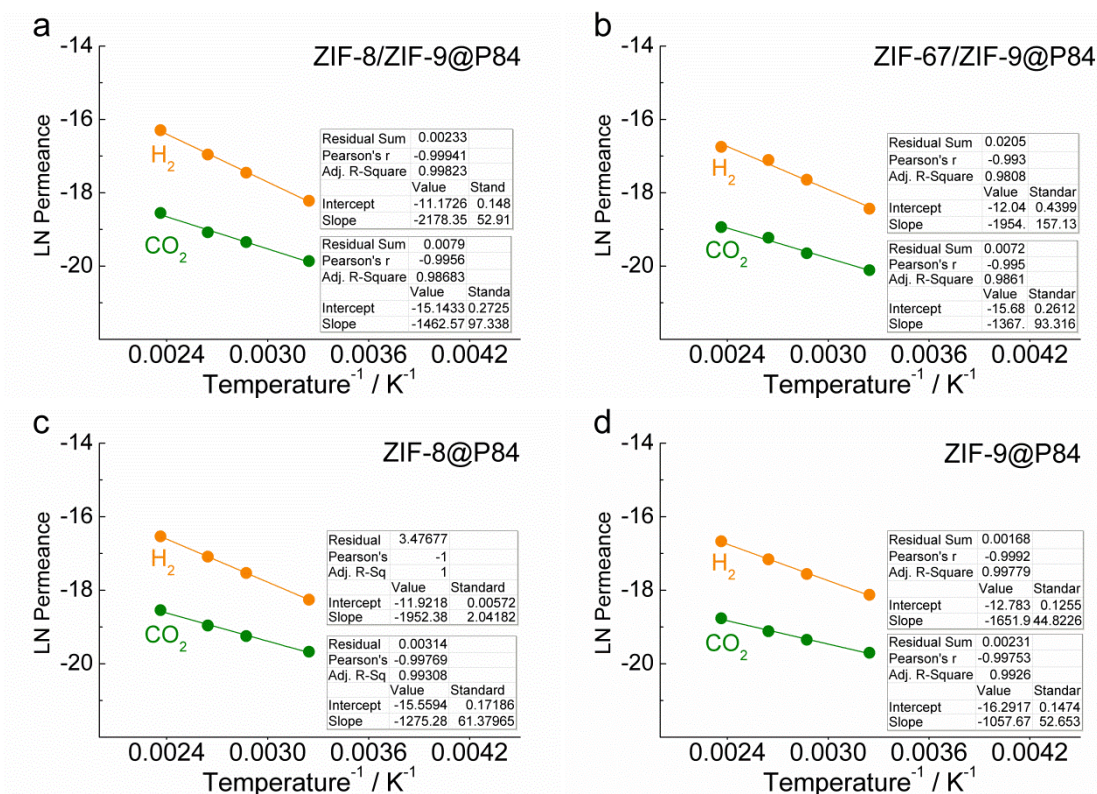

Figure S9.  $H_2$  and  $CO_2$  permeance fittings to the Arrhenius equation in the 35-150 °C range resulting in the apparent activation energies  $E_a$  shown in Table 2 for the ZIF-8/ZIF-9 (a) and ZIF-67/ZIF-9 (b) double-layered and the ZIF-8 (c) and ZIF-9@P84 (d) single-layered HF membranes.

Table S2. H<sub>2</sub>/CO<sub>2</sub> separation performance of MOF-supported hollow fiber membranes in the literature.

| Ref.             | MOF                     | HF support          | T [°C] | H <sub>2</sub> permeance [GPU] | $\alpha$ H <sub>2</sub> /CO <sub>2</sub> |
|------------------|-------------------------|---------------------|--------|--------------------------------|------------------------------------------|
| S6               | ZIF-90                  | Torlon <sup>®</sup> | 35     | 580                            | 1.8*                                     |
| S7               | ZIF-7                   | PVDF                | Room   | 7031                           | 18.4*                                    |
| S7               | ZIF-8                   | PVDF                | Room   | 6016                           | 16.3*                                    |
| S8               | ZIF-8                   | PVDF                | Room   | 5684                           | 12.4                                     |
| S8               | ZIF-7                   | PVDF                | Room   | 3053                           | 15.9                                     |
| S9               | ZIF-8                   | PVDF                | -      | 60000                          | 7.0*                                     |
| S10              | HKUST-1                 | PVDF                | 25     | 5884                           | 8.1                                      |
| S11              | HKUST-1                 | PSf / PMDS          | Room   | 1449                           | 21.0*                                    |
| S12              | HKUST-1                 | PAN                 | 20     | 210448                         | 7.1                                      |
| S8               | HKUST-1                 | PVDF                | Room   | 17957                          | 7.9                                      |
| S13              | NH <sub>2</sub> -MIL-53 | PVDF                | Room   | 16179* / 12576                 | 30.4* / 32.3                             |
| <b>This work</b> | ZIF-8/ZIF-9             | P84 <sup>®</sup>    | 150    | 250                            | 9.6                                      |
| <b>This work</b> | ZIF-67/ZIF-9            | P84 <sup>®</sup>    | 150    | 159                            | 9.0                                      |

\*Ideal selectivities.

### Supporting Information References

- S1. A. L. Myers and J. M. Prausnitz, *AIChE J.*, 1965, **11**, 121-127.
- S2. I. Langmuir, *J. Am. Chem. Soc.*, 1918, **40**, 1361-1403.
- S3. L. D. Gelb and K. E. Gubbins, *Langmuir*, 1999, **15**, 305-308.
- S4. T. F. Willems, C. H. Rycroft, M. Kazi, J. C. Meza and M. Haranczyk, *Micropor. Mesopor. Mat.*, 2012, **149**, 134-141.
- S5. R. L. Martin, B. Smit, and M. Haranczyk, *J. Chem. Inf. Model.*, 2012, **52**, 308-318.
- S6. A. J. Brown, J. R. Johnson, M. E. Lydon, W. J. Koros, C. W. Jones and S. Nair, *Angew. Chem. Int. Ed.*, 2012, **51**, 10615-10618.
- S7. W. Li, Q. Meng, X. Li, C. Zhang, Z. Fan and G. Zhang, *Chem. Commun.*, 2014, **50**, 9711-9713.
- S8. W. Li, Q. Meng, C. Zhang and G. Zhang, *Chem. Eur. J.*, 2015, **21**, 7224-7230.
- S9. J. Hou, P. D. Sutrisna, Y. Zhang and V. Chen, *Angew. Chem. Int. Ed.*, 2016, **55**, 3947-3951.
- S10. Y. Mao, J. Li, W. Cao, Y. Ying, L. Sun and X. Peng, *ACS Appl. Mater. Interfaces*, 2014, **6**, 4473-4479.
- S11. W. Li, G. Zhang, C. Zhang, Q. Meng, Z. Fan and C. Gao, *Chem. Commun.*, 2014, **50**, 3214-3216.
- S12. W. Li, Z. Yang, G. Zhang, Z. Fan, Q. Meng, C. Shen and C. Gao, *J. Mater. Chem. A*, 2014, **2**, 2110-2118.
- S13. W. Li, P. Su, G. Zhang, C. Shen and Q. Meng, *J. Membr. Sci.*, 2015, **495**, 384-391.
